# Supplementary material
Source: PubMed Central journal article supplement (PMC8523216)
Supplement: NIHMS1607918-supplement-Supplementary_Material.pdf [file NIHMS1607918-supplement-Supplementary_Material.pdf]

| <i>Supplemental Table 1. Mediation Results for Models with Neurocognition as Proposed Mediator Between Negative Symptoms and Work Functioning at 10, 15, and 20 years</i>                |         |       |      |         |
|------------------------------------------------------------------------------------------------------------------------------------------------------------------------------------------|---------|-------|------|---------|
| Path                                                                                                                                                                                     | $\beta$ | B     | SE   | p-value |
| Prospective Model - 10-year work functioning ( $n = 274$ ) <sup>b</sup>                                                                                                                  |         |       |      |         |
| $\chi^2 = 10.51, df = 10, p = .40; CFI = 1.00; RMSEA = .01$                                                                                                                              |         |       |      |         |
| Indirect effect through processing speed: $z = -.37, SE = .12, 95\% CI [-.63, -.15]$                                                                                                     |         |       |      |         |
| Indirect effect through general knowledge: $z = -.07, SE = .06, 95\% CI [-.20, .02]$                                                                                                     |         |       |      |         |
| 2-year negative symptoms $\rightarrow$ 2-year poverty of speech <sup>a,c</sup>                                                                                                           | .75     | 1.00  | --   | --      |
| 2-year negative symptoms $\rightarrow$ 2-year flat affect <sup>a</sup>                                                                                                                   | .57     | 1.12  | .21  | <.001   |
| 2-year negative symptoms $\rightarrow$ 2-year psychomotor retardation <sup>a</sup>                                                                                                       | .78     | .51   | .08  | <.001   |
| 2-year negative symptoms $\rightarrow$ 10-year work functioning                                                                                                                          | .05     | .12   | .25  | .64     |
| 2-year negative symptoms $\rightarrow$ 4.5-year processing speed                                                                                                                         | -.40    | -7.29 | 1.94 | <.001   |
| 2-year negative symptoms $\rightarrow$ 4.5-year general knowledge                                                                                                                        | -.30    | -2.32 | .82  | .005    |
| 4.5-year processing speed $\rightarrow$ 10-year work functioning                                                                                                                         | .37     | .05   | .01  | <.001   |
| 4.5-year general knowledge $\rightarrow$ 10-year work functioning                                                                                                                        | .09     | .03   | .02  | .27     |
| 2-year positive symptoms $\rightarrow$ 10-year work functioning                                                                                                                          | -.20    | -.40  | .15  | .006    |
| Prospective Model - 15-year work functioning ( $n = 269$ ) <sup>b</sup>                                                                                                                  |         |       |      |         |
| $\chi^2 = 9.20, df = 10, p = .51; CFI = 1.00; RMSEA = .00$                                                                                                                               |         |       |      |         |
| Indirect effect through processing speed: $z = -.21, SE = .09, 95\% CI [-.41, -.06]$                                                                                                     |         |       |      |         |
| Indirect effect through general knowledge: $z = -.02, SE = .07, 95\% CI [-.18, .12]$                                                                                                     |         |       |      |         |
| 2-year negative symptoms $\rightarrow$ 2-year poverty of speech <sup>a,c</sup>                                                                                                           | .76     | 1.00  | --   | --      |
| 2-year negative symptoms $\rightarrow$ 2-year flat affect <sup>a</sup>                                                                                                                   | .57     | 1.16  | .21  | <.001   |
| 2-year negative symptoms $\rightarrow$ 2-year psychomotor retardation <sup>a</sup>                                                                                                       | .78     | .51   | .08  | <.001   |
| 2-year negative symptoms $\rightarrow$ 15-year work functioning                                                                                                                          | -.20    | -.43  | .27  | .11     |
| 2-year negative symptoms $\rightarrow$ 4.5-year processing speed                                                                                                                         | -.39    | -6.96 | 1.93 | <.001   |
| 2-year negative symptoms $\rightarrow$ 4.5-year general knowledge                                                                                                                        | -.30    | -2.24 | .81  | .006    |
| 4.5-year processing speed $\rightarrow$ 15-year work functioning                                                                                                                         | .22     | .03   | .01  | .03     |
| 4.5-year general knowledge $\rightarrow$ 15-year work functioning                                                                                                                        | .04     | .01   | .03  | .70     |
| 2-year positive symptoms $\rightarrow$ 15-year work functioning                                                                                                                          | -.27    | -.55  | .17  | .001    |
| Prospective Model - 20-year work functioning ( $n = 268$ ) <sup>b</sup>                                                                                                                  |         |       |      |         |
| $\chi^2 = 9.82, df = 10, p = .46; CFI = 1.00; RMSEA = .00$                                                                                                                               |         |       |      |         |
| Indirect effect through processing speed: $z = -.21, SE = .09, 95\% CI [-.42, -.06]$                                                                                                     |         |       |      |         |
| Indirect effect through general knowledge: $z = -.05, SE = .08, 95\% CI [-.21, .10]$                                                                                                     |         |       |      |         |
| 2-year negative symptoms $\rightarrow$ 2-year poverty of speech <sup>a,c</sup>                                                                                                           | .77     | 1.00  | --   | --      |
| 2-year negative symptoms $\rightarrow$ 2-year flat affect <sup>a</sup>                                                                                                                   | .56     | 1.14  | .21  | <.001   |
| 2-year negative symptoms $\rightarrow$ 2-year psychomotor retardation <sup>a</sup>                                                                                                       | .78     | .50   | .08  | <.001   |
| 2-year negative symptoms $\rightarrow$ 20-year work functioning                                                                                                                          | -.26    | -.57  | .30  | .06     |
| 2-year negative symptoms $\rightarrow$ 4.5-year processing speed                                                                                                                         | -.40    | -7.10 | 1.91 | <.001   |
| 2-year negative symptoms $\rightarrow$ 4.5-year general knowledge                                                                                                                        | -.32    | -2.34 | .80  | .004    |
| 4.5-year processing speed $\rightarrow$ 20-year work functioning                                                                                                                         | .25     | .03   | .01  | .02     |
| 4.5-year general knowledge $\rightarrow$ 20-year work functioning                                                                                                                        | .05     | .02   | .03  | .61     |
| 2-year positive symptoms $\rightarrow$ 20-year work functioning                                                                                                                          | .01     | .02   | .19  | .91     |
| <sup>a</sup> Loadings are for observed negative symptom subscales on the latent negative symptoms indicator                                                                              |         |       |      |         |
| <sup>b</sup> 193 participants participated in the 10-year follow-up, 151 participated in the 15-year follow-up, and 134 in the 20-year follow-up; FIML was used to estimate missing data |         |       |      |         |
| <sup>c</sup> Regression weight set at 1.                                                                                                                                                 |         |       |      |         |

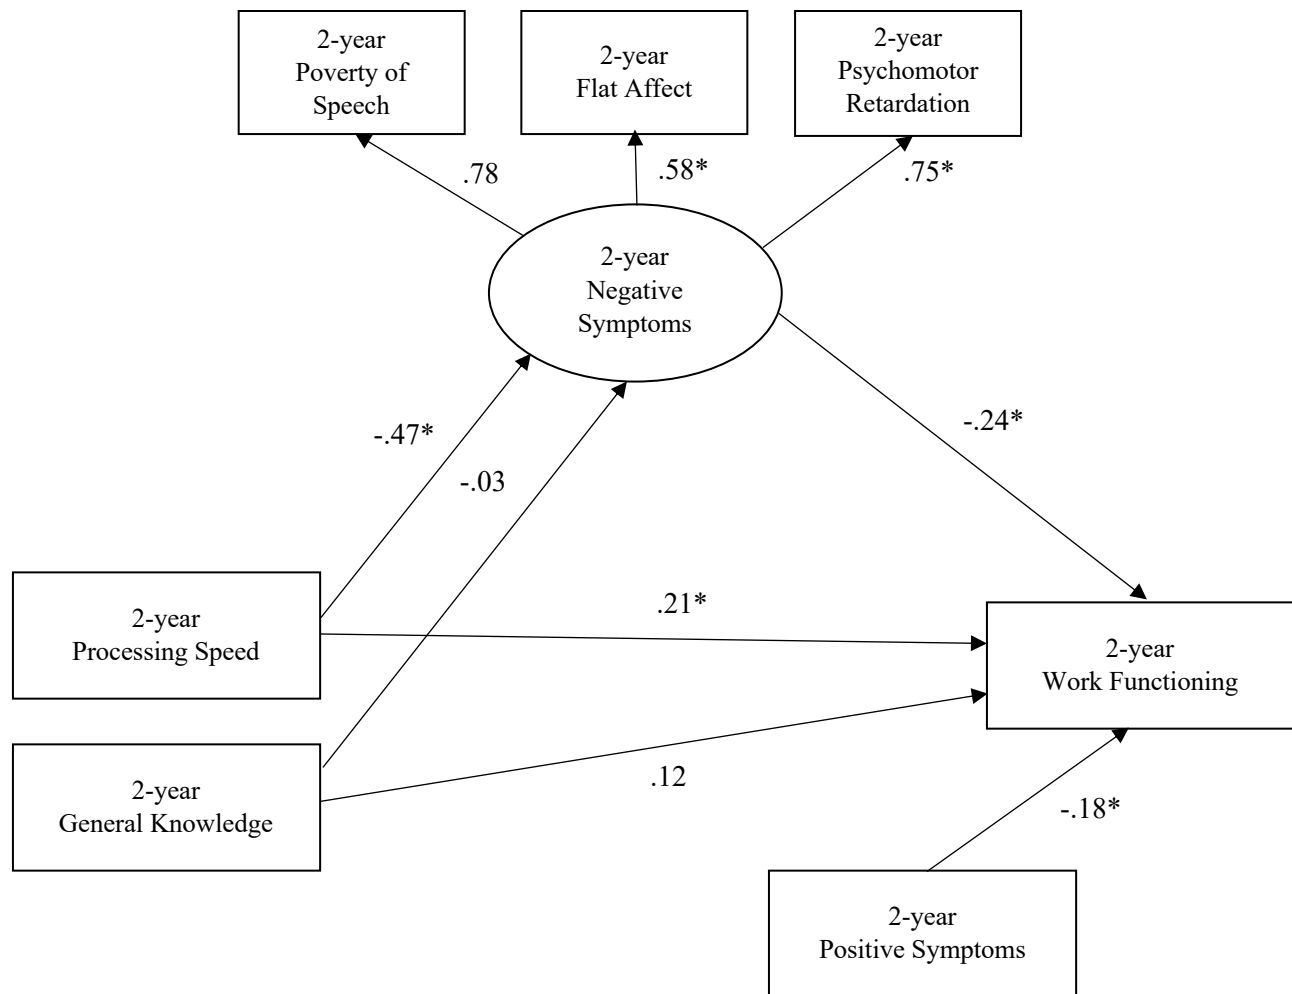

*Supplemental Figure 1.* Model testing mediating effects of 2-year negative symptoms in associations between 2-year neurocognition and 2-year work functioning. All coefficients are standardized. For clarity, covariances and error terms are not depicted. \* $p < .05$ .

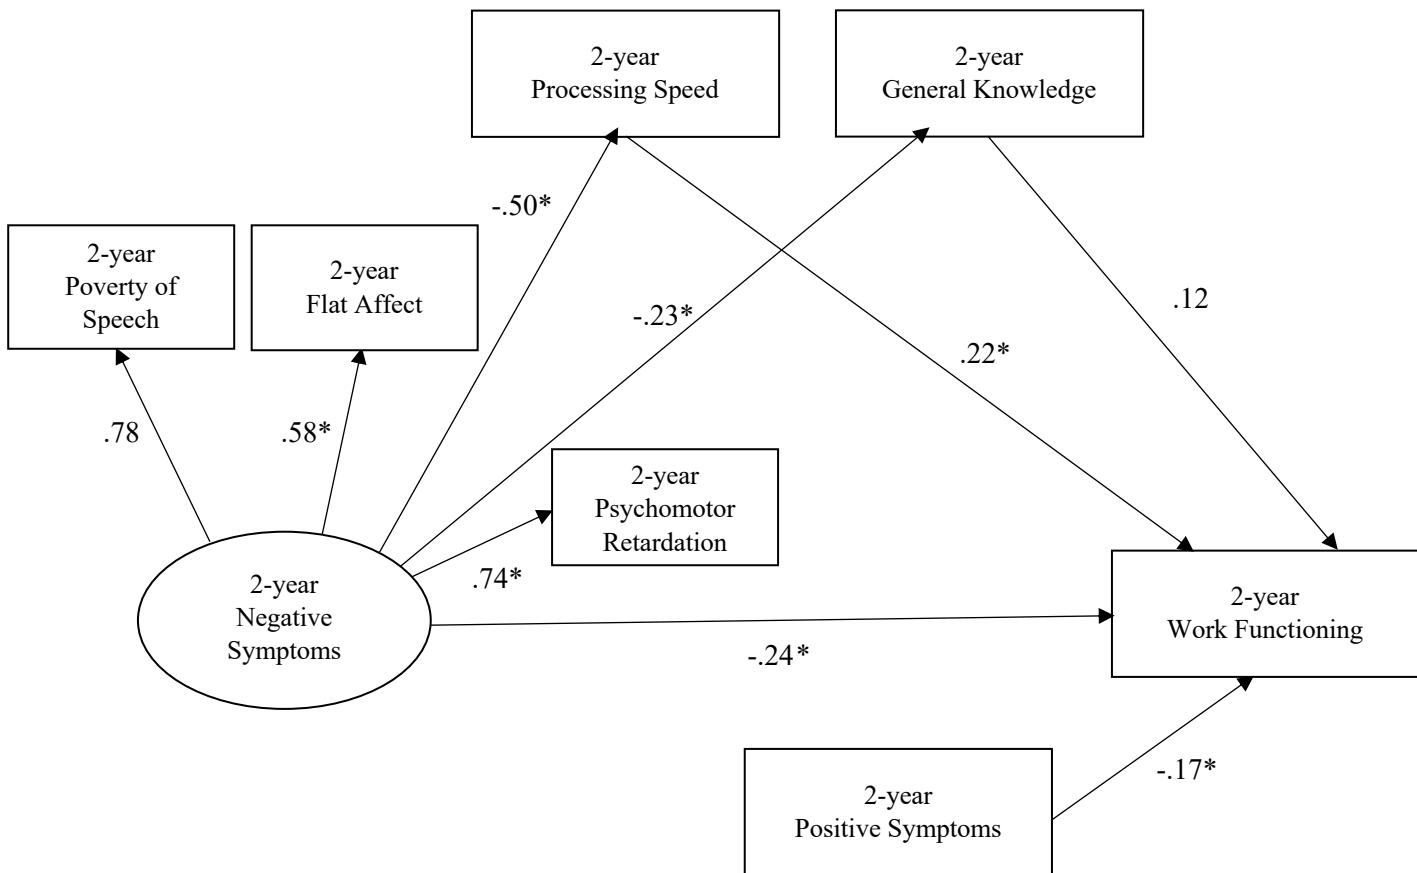

*Supplemental Figure 2.* Model testing mediating effects of 2-year neurocognition in association between 2-year negative symptoms and 2-year work functioning. All coefficients are standardized. For clarity, covariances and error terms are not depicted. \* $p < .05$ .

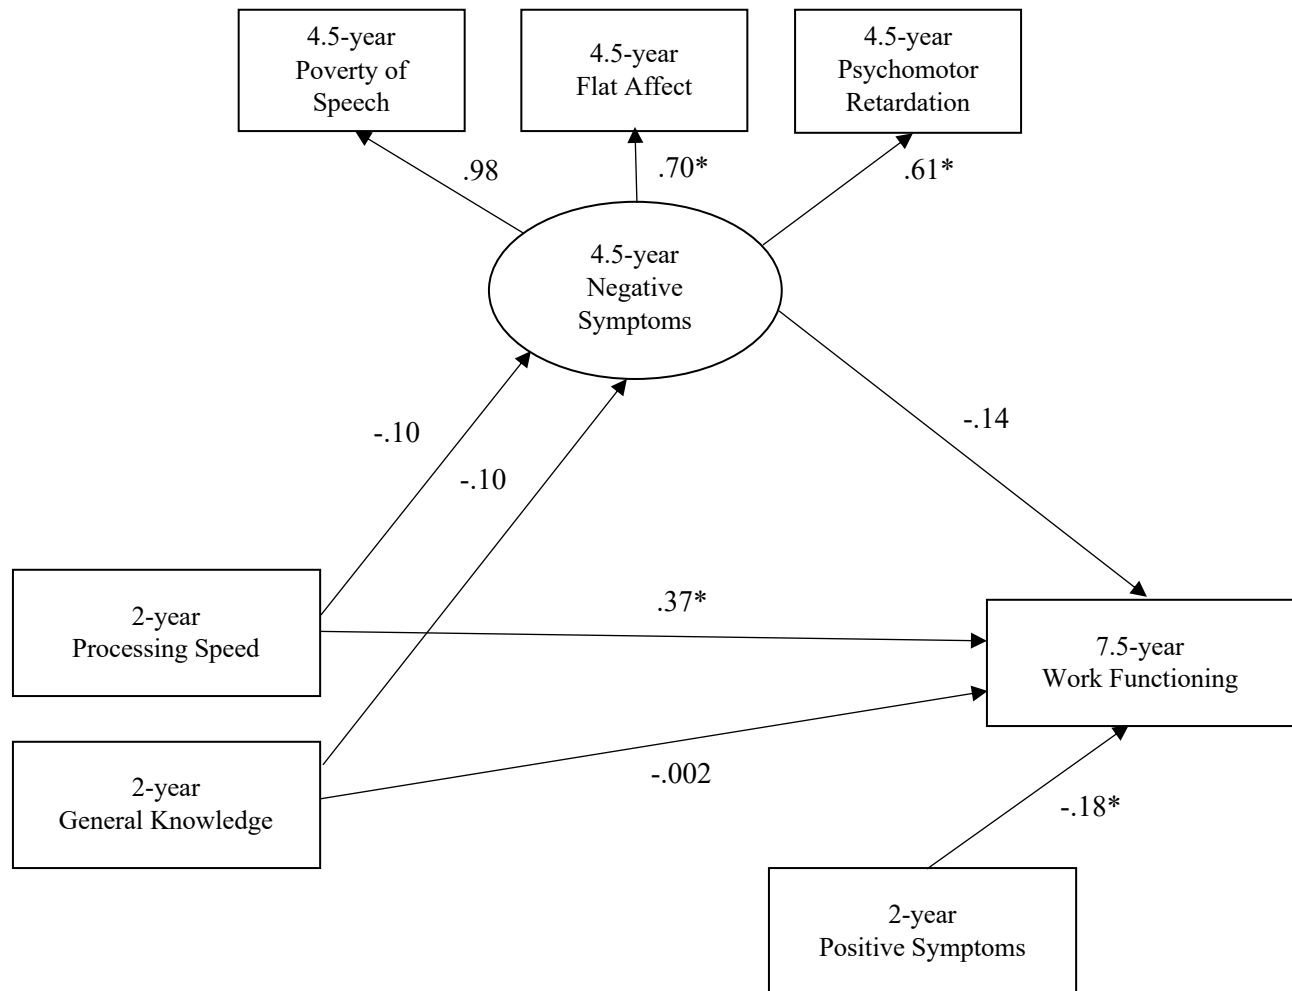

*Supplemental Figure 3.* Model testing mediating effects of 4.5-year negative symptoms in associations between 2-year neurocognition and 7.5-year work functioning. All coefficients are standardized. For clarity, covariances and error terms are not depicted.  $*p < .05$ .

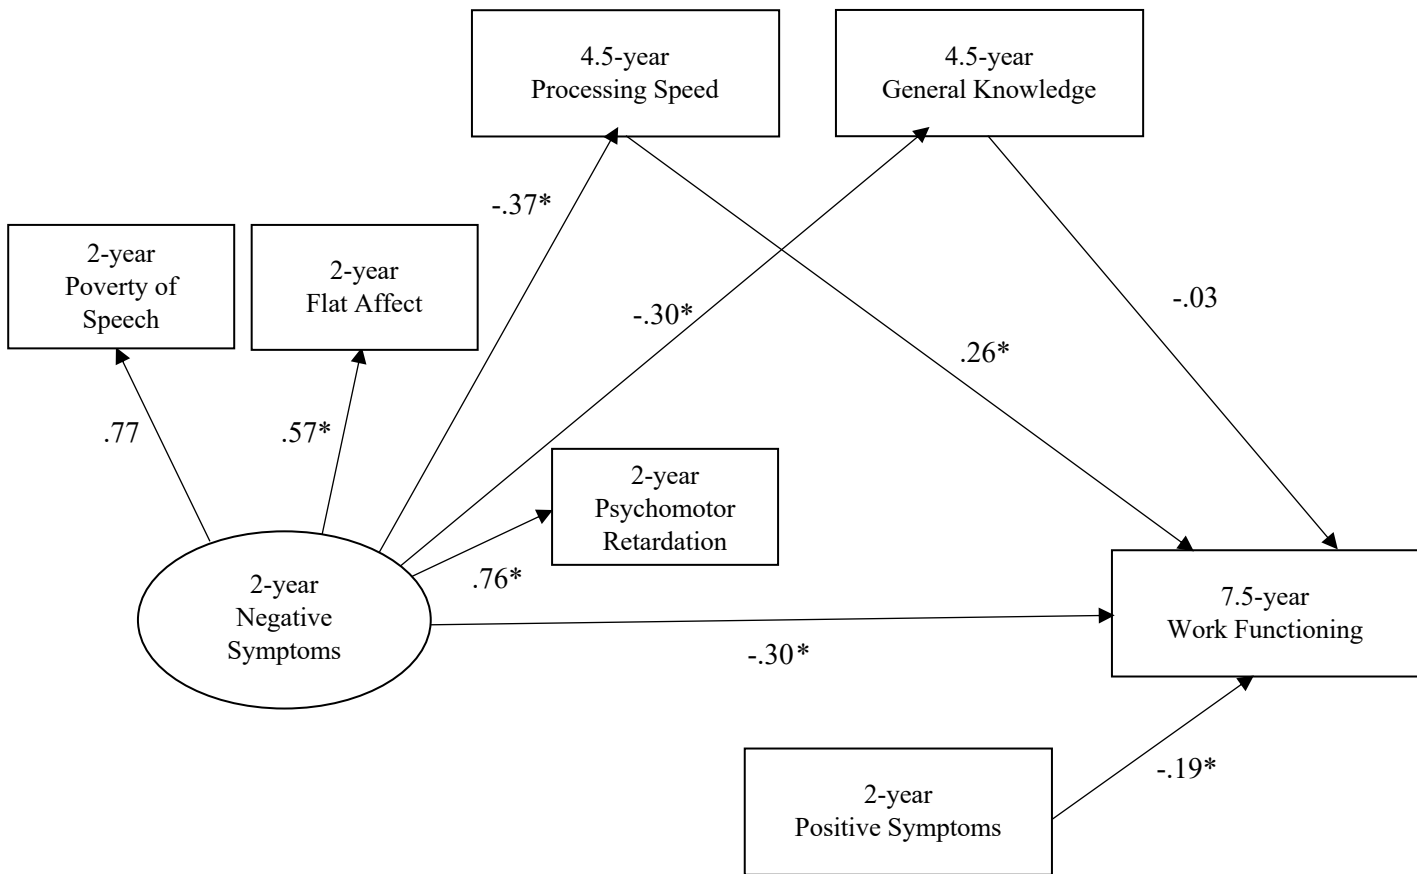

*Supplemental Figure 4.* Model testing mediating effects of 4.5-year neurocognition in association between 2-year negative symptoms and 7.5-year work functioning. All coefficients are standardized. For clarity, covariances and error terms are not depicted.  $*p < .05$ .

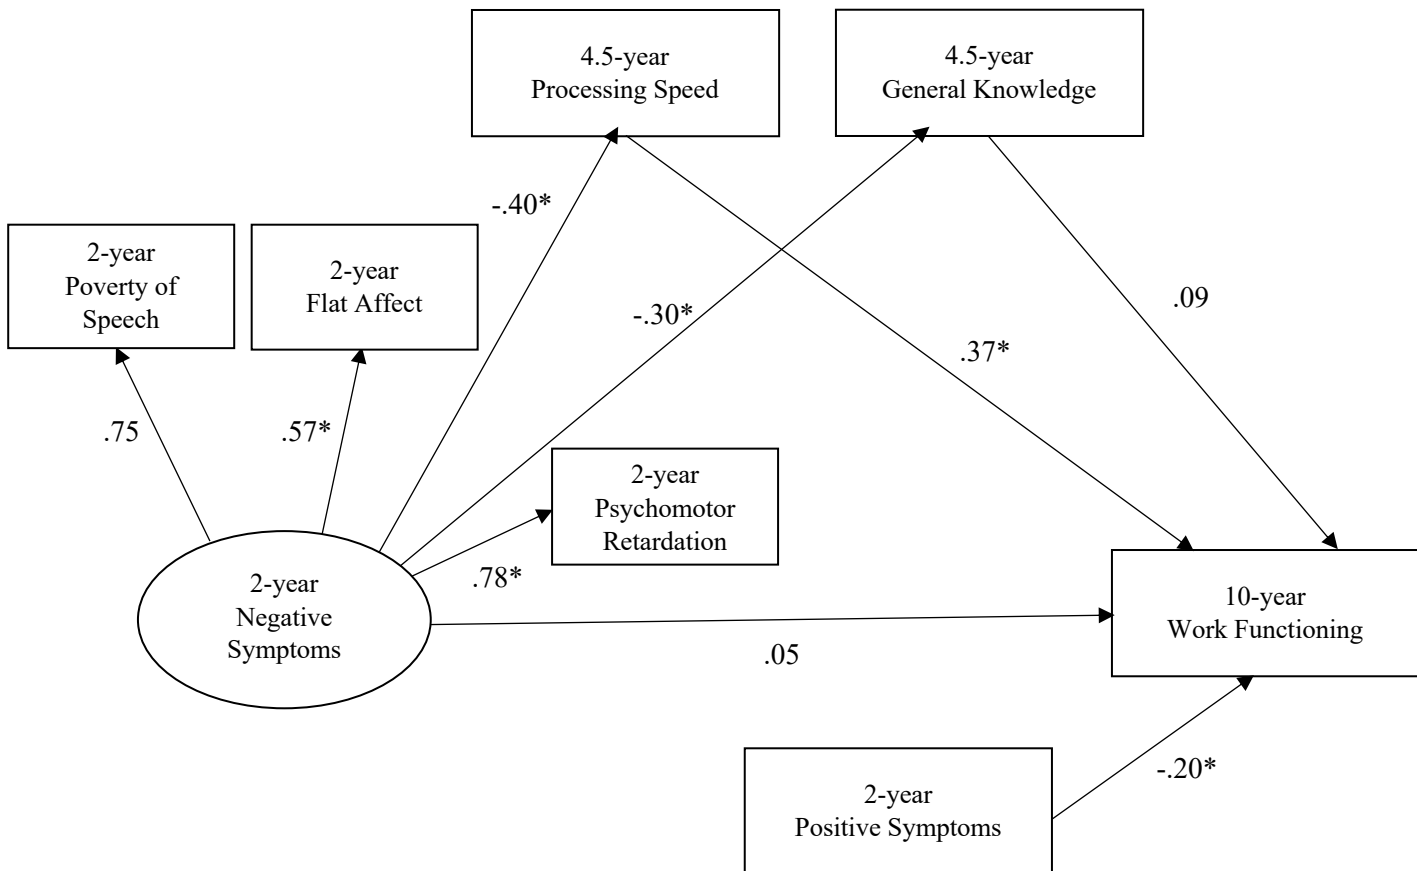

*Supplemental Figure 5.* Model testing mediating effects of 4.5-year neurocognition in association between 2-year negative symptoms and 10-year work functioning. All coefficients are standardized. For clarity, covariances and error terms are not depicted.  $*p < .05$ .

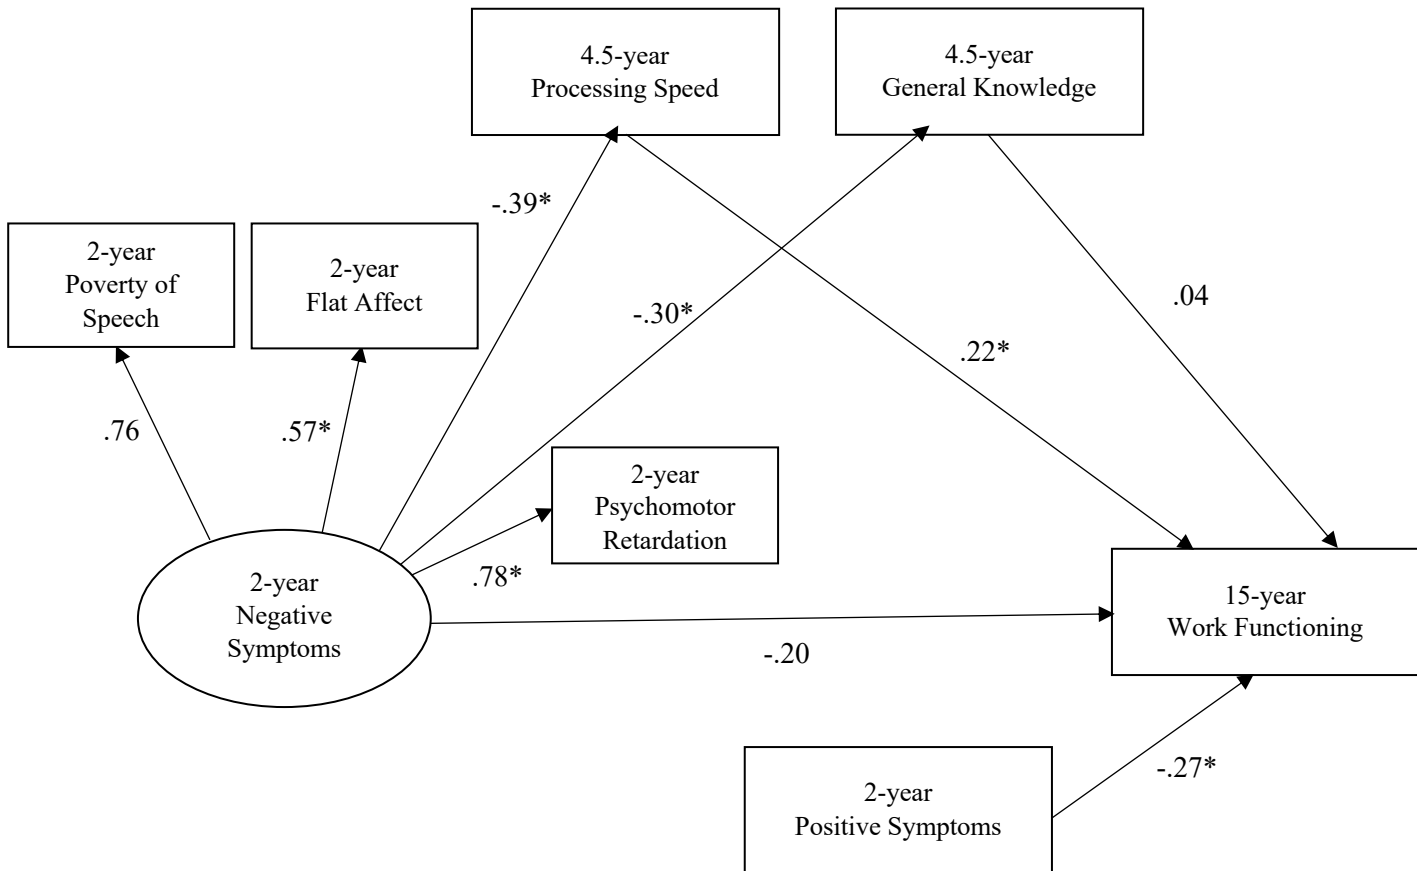

*Supplemental Figure 6.* Model testing mediating effects of 4.5-year neurocognition in association between 2-year negative symptoms and 15-year work functioning. All coefficients are standardized. For clarity, covariances and error terms are not depicted.  $*p < .05$ .

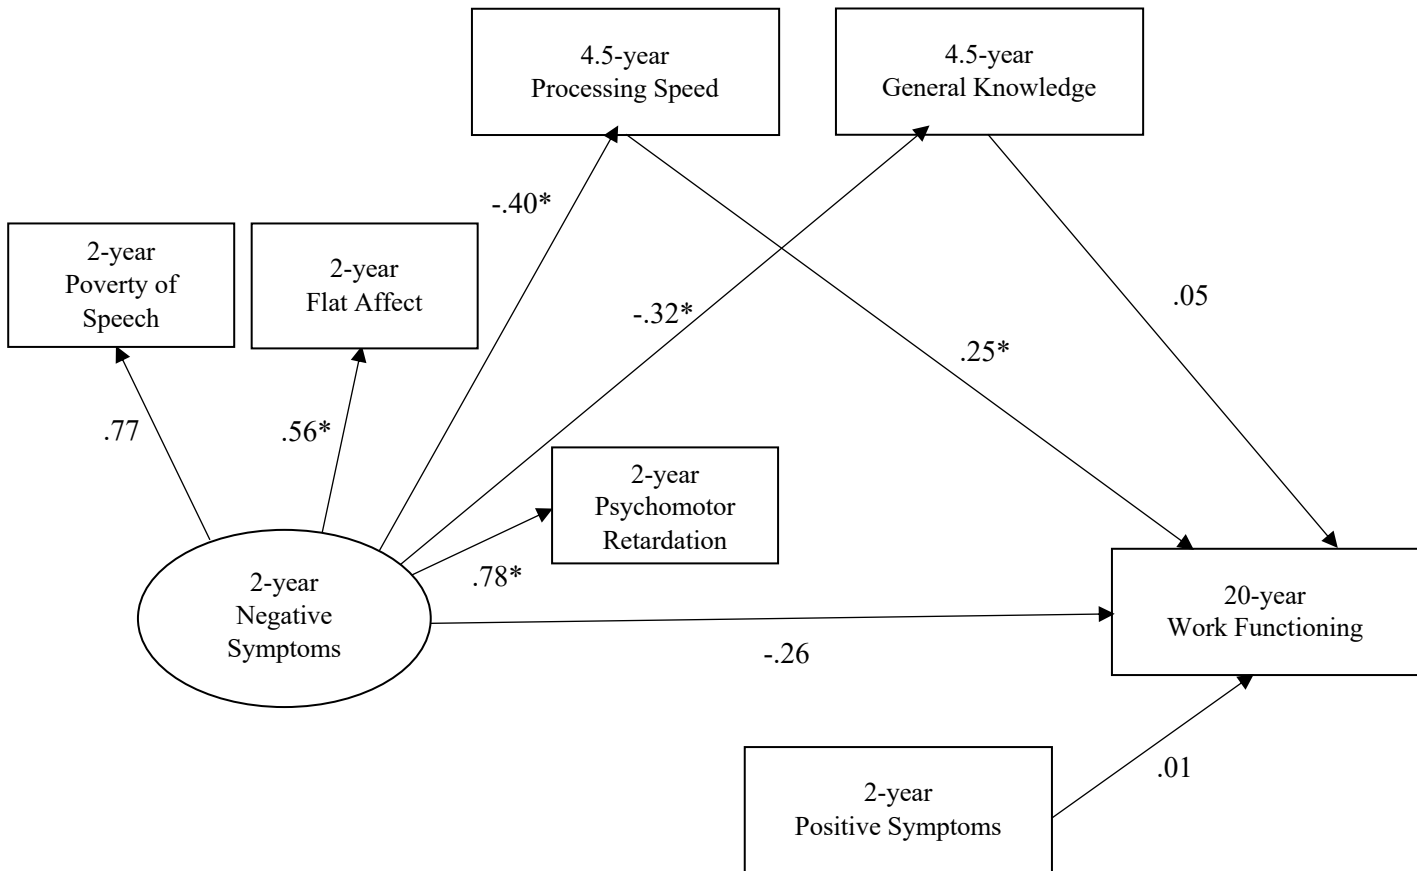

*Supplemental Figure 7.* Model testing mediating effects of 4.5-year neurocognition in association between 2-year negative symptoms and 20-year work functioning. All coefficients are standardized. For clarity, covariances and error terms are not depicted.  $*p < .05$ .
